# Supplementary material for: Costs of purchase, maintenance, microbiological control, and reprocessing of a reusable duodenoscope
Source: PubMed Central journal article supplement — Endosc Int Open. 2023 Sep 21;11(9):E873–9. doi: 10.1055/a-2153-7016 (PMC10629588; doi:10.1055/a-2153-7016), 2023-09-21
Supplement: 10-1055-a-2153-7016_21578813.pdf.pdf [file 10-1055-a-2153-7016_21578813.pdf.pdf]

## Supplementary material

### Supplement Methods 1 Survey for the economic assessment of duodenoscope reprocessing

**Scope:** Interventional use of the duodenoscope for a patient managed with a reusable medical device with automated washing according to current recommendations [specify storage methods].

**Exclusion:** treatment by low temperature sterilization with hydrogen peroxide is not included because of the dimensional characteristics of duodenoscopes (length and internal diameter of the lumens of the ducts); for which only treatment by ethylene oxide could be recommended (see FDA). However, this treatment is no longer recommended for hospital sterilization in France.

### Explanatory flowchart

*Please see Figure 1*

AER: Automated Endoscope Reprocessing machine; HC: healthcare. Microbiological control: controls (with consumables and human resources) of the duodenoscope, the water, the endoscope drying cabinet, and the room environment.

### References used:

- The technical guide for the treatment of endoscopes from the DGOS
- Instruction No. DGOS/PF2/DGS/VSS1/2016/220 of July 4, 2016, on the treatment of flexible heat-sensitive endoscopes with channels within healthcare facilities

### General data:

- Name of the establishment:
- Organization of endoscope treatment:
  - Centralized unit for the establishment: YES – NO
  - Gastroenterology satellite unit: YES – NO
  - Treatment with Automated Endoscope Reprocessing (AER) machine: YES – NO
    - If YES, number of AER
  - Heat-sensitive endoscope drying cabinet (EDC): YES – NO
    - If YES, number of EDC:
- Number of annual endoscope treatment cycles in the unit:
- Number of annual duodenoscope treatment cycles:
- Number of duodenoscopes in operation in the center:
- Number of annual duodenoscope uses
  - Diagnostic purpose:
  - Interventional purpose (ERCP):

## Supplementary material

1. Treatment costs (direct costs):**a. Consumable supply costs:**

| Stage                                  | Consumable supply used                               | Quantity | Unit price (including tax) | Total |
|----------------------------------------|------------------------------------------------------|----------|----------------------------|-------|
| 1. Pre-treatment                       |                                                      |          |                            |       |
| Wiping                                 | Compress/absorbent pad                               |          |                            |       |
| Rinsing                                | Water used (quality to be defines)                   |          |                            |       |
| Packaging                              | « Red » bags (cap/envelope)                          |          |                            |       |
| Personal protective equipment          | Single use gloves                                    |          |                            |       |
|                                        | Glasses                                              |          |                            |       |
| 2. Preliminary stage automated washing |                                                      |          |                            |       |
| Immersion                              | Detergent                                            |          |                            |       |
|                                        | Water                                                |          |                            |       |
| Channel irrigation                     | Syringe                                              |          |                            |       |
|                                        | Water used                                           |          |                            |       |
| Sheath wiping                          | Compress/ absorbent pad                              |          |                            |       |
| Swabbing                               | Single use swabs                                     |          |                            |       |
| Extremity brushing                     | Brushes                                              |          |                            |       |
| Personal protective equipment          | Single use gloves                                    |          |                            |       |
|                                        | Glasses                                              |          |                            |       |
|                                        | Single use apron                                     |          |                            |       |
| 3. Automated washing                   |                                                      |          |                            |       |
| First rinsing                          | Water (volume consumed)                              |          |                            |       |
| Disinfection                           | Disinfectant                                         |          |                            |       |
| Second rinsing                         | Bacteriologically controlled water (volume consumed) |          |                            |       |
| Automatization                         | Electricity consumed                                 |          |                            |       |
| Drying                                 |                                                      |          |                            |       |
| Personal protective equipment          | Single use gloves                                    |          |                            |       |
|                                        | FFP2 mask                                            |          |                            |       |
|                                        | Glasses                                              |          |                            |       |
| 4. Packaging                           | « Green » bag (cap/envelope)                         |          |                            |       |
|                                        | Nonwoven drape                                       |          |                            |       |
| Personal protective equipment          | Single use gloves                                    |          |                            |       |
| 5. Storage                             |                                                      |          |                            |       |

## Supplementary material

## b. Cost of mobilized human resources:

| Stage                                  | Who/qualification | Time spent | Weighted cost |
|----------------------------------------|-------------------|------------|---------------|
| 1. Pre-treatment                       |                   |            |               |
| 2. Preliminary stage automated washing |                   |            |               |
| 3. Automated washing                   |                   |            |               |
| 4. Drying-Packaging                    |                   |            |               |
| 5. Storage                             |                   |            |               |
| 6. Provision                           |                   |            |               |
| 7. Controls before use                 |                   |            |               |

2. Indirect and associated costs

## a. For the microbiological control of duodenoscopes

| Consumable cost                   | Consumable used                                       | Quantity   | Unit price (including tax) | Total |
|-----------------------------------|-------------------------------------------------------|------------|----------------------------|-------|
| 1. In-situ control                | Collection vial                                       |            |                            |       |
|                                   | Sterile swab                                          |            |                            |       |
|                                   | Disinfecting alcohol                                  |            |                            |       |
|                                   | Sterile gloves                                        |            |                            |       |
| 2. Laboratory control             | B code from the biological procedures' classification |            |                            |       |
|                                   | ?                                                     |            |                            |       |
| Cost of mobilized human resources | Who/qualification                                     | Time spent | Weighted cost              |       |
| Collection                        |                                                       |            |                            |       |
| Transport                         |                                                       |            |                            |       |
| Analysis                          |                                                       |            |                            |       |
| Decision                          |                                                       |            |                            |       |

## b. For the microbiological control of the treatment unit environment

| Consumable cost       | Consumable used      | Quantity | Unit price (including tax) | Total |
|-----------------------|----------------------|----------|----------------------------|-------|
| 1. In-situ control    | Collection vial      |          |                            |       |
|                       | Sterile swab         |          |                            |       |
|                       | Disinfecting alcohol |          |                            |       |
|                       | Sterile gloves       |          |                            |       |
| 3. Laboratory control | ?                    |          |                            |       |
|                       | ?                    |          |                            |       |

## Supplementary material

| Cost of mobilized human resources | Who/qualification | Time spent | Weighted cost |
|-----------------------------------|-------------------|------------|---------------|
| Collection                        |                   |            |               |
| Transport                         |                   |            |               |
| Analysis                          |                   |            |               |
| Decision                          |                   |            |               |

## c. For the microbiological control of associated equipment

These costs will be weighted by:

- ✓ On the one hand, according to the number of controls carried out (for duodenoscopes it is recommended to perform a quarterly control at least, and, if necessary, at each maintenance return)
- ✓ on the other hand, according to the duodenoscope occupancy ratio of the automated washing equipment and cabinets

| Consumable cost                         | Consumable used                                            | Quantity   | Unit price (including tax) | Total |
|-----------------------------------------|------------------------------------------------------------|------------|----------------------------|-------|
| <b>Automated washing</b>                | <i>DGOS Guide for automated washing, 2003</i>              |            |                            |       |
| 1. In-situ control of automated washing | Collection vial                                            |            |                            |       |
|                                         | Sterile swab                                               |            |                            |       |
|                                         | Disinfecting alcohol                                       |            |                            |       |
|                                         | Sterile gloves                                             |            |                            |       |
| 2. Laboratory control                   | IVDR (in-vitro diagnostic medical devices)                 |            |                            |       |
|                                         | Other consumables                                          |            |                            |       |
| Cost of mobilized human resources       | Who/qualification                                          | Time spent | Weighted cost              |       |
| Collection                              |                                                            |            |                            |       |
| Transport                               |                                                            |            |                            |       |
| Analysis                                |                                                            |            |                            |       |
| Decision                                |                                                            |            |                            |       |
| <b>Enceinte</b>                         | <i>ARLIN Pays de Loire Guide 2015/ Reco SF2H-SFED 2011</i> |            |                            |       |
| 1. In-situ control                      | Agar plate/culture media                                   |            |                            |       |
|                                         | Collection vial                                            |            |                            |       |
|                                         | Sterile swab                                               |            |                            |       |
|                                         | Disinfecting alcohol                                       |            |                            |       |
|                                         | Sterile gloves                                             |            |                            |       |
| 2. Laboratory control                   | IVDR                                                       |            |                            |       |
|                                         | Other consumables                                          |            |                            |       |
| Cost of mobilized human resources       | Who/qualification                                          | Time spent | Weighted cost              |       |
| Collection                              |                                                            |            |                            |       |

## Supplementary material

|           |  |  |  |
|-----------|--|--|--|
| Transport |  |  |  |
| Analysis  |  |  |  |
| Decision  |  |  |  |

## d. Purchase and maintenance costs

For duodenoscopes: the costs are to be calculated on the annual basis of the number of uses per endoscope in relation to its average life span

For automated washing equipment and cabinets: the costs are to be weighted by the percentage of use dedicated to duodenoscopes.

|                                         |                                                                                                                                                                                                                                                                                                                                                                                                                                     |  |  |  |
|-----------------------------------------|-------------------------------------------------------------------------------------------------------------------------------------------------------------------------------------------------------------------------------------------------------------------------------------------------------------------------------------------------------------------------------------------------------------------------------------|--|--|--|
| 1. Duodenoscope                         |                                                                                                                                                                                                                                                                                                                                                                                                                                     |  |  |  |
| Purchase cost                           | Endoscope                                                                                                                                                                                                                                                                                                                                                                                                                           |  |  |  |
|                                         | Accessories                                                                                                                                                                                                                                                                                                                                                                                                                         |  |  |  |
|                                         | Warranty                                                                                                                                                                                                                                                                                                                                                                                                                            |  |  |  |
| Training costs                          | Biomedical staff                                                                                                                                                                                                                                                                                                                                                                                                                    |  |  |  |
|                                         | Users                                                                                                                                                                                                                                                                                                                                                                                                                               |  |  |  |
| Maintenance costs                       | Other consumables                                                                                                                                                                                                                                                                                                                                                                                                                   |  |  |  |
|                                         | Replacement parts                                                                                                                                                                                                                                                                                                                                                                                                                   |  |  |  |
|                                         | Service                                                                                                                                                                                                                                                                                                                                                                                                                             |  |  |  |
|                                         | Troubleshooting assistance                                                                                                                                                                                                                                                                                                                                                                                                          |  |  |  |
| Average life span of the medical device |                                                                                                                                                                                                                                                                                                                                                                                                                                     |  |  |  |
|                                         |                                                                                                                                                                                                                                                                                                                                                                                                                                     |  |  |  |
| 2. Automated washing                    | <i>Quality control of automated washing Université de Technologie de Compiègne 2006 guidelines</i><br><a href="http://www.utc.fr/master-qualite/public/publications/qualite_et_biomedical/UTC/des_s_tbh/03-04/projets/chaussende_loheal/main%20Clateau%20CH%20Comp.htm">http://www.utc.fr/master-qualite/public/publications/qualite_et_biomedical/UTC/des_s_tbh/03-04/projets/chaussende_loheal/main%20Clateau%20CH%20Comp.htm</a> |  |  |  |
| Purchase cost                           | Endoscope                                                                                                                                                                                                                                                                                                                                                                                                                           |  |  |  |
|                                         | Accessories                                                                                                                                                                                                                                                                                                                                                                                                                         |  |  |  |
|                                         | Warranty                                                                                                                                                                                                                                                                                                                                                                                                                            |  |  |  |
| Training costs                          | Biomedical staff                                                                                                                                                                                                                                                                                                                                                                                                                    |  |  |  |
|                                         | Users                                                                                                                                                                                                                                                                                                                                                                                                                               |  |  |  |
| Qualification costs                     |                                                                                                                                                                                                                                                                                                                                                                                                                                     |  |  |  |
| Annual requalification costs            |                                                                                                                                                                                                                                                                                                                                                                                                                                     |  |  |  |
| Maintenance costs                       | Consumables                                                                                                                                                                                                                                                                                                                                                                                                                         |  |  |  |
|                                         | Replacement parts                                                                                                                                                                                                                                                                                                                                                                                                                   |  |  |  |
|                                         | Service                                                                                                                                                                                                                                                                                                                                                                                                                             |  |  |  |
| Average life span of the medical device |                                                                                                                                                                                                                                                                                                                                                                                                                                     |  |  |  |
|                                         |                                                                                                                                                                                                                                                                                                                                                                                                                                     |  |  |  |

## Supplementary material

| 3. EDC                                  | <i>High Council of Public Health Recommendations, 2013</i> |  |  |  |
|-----------------------------------------|------------------------------------------------------------|--|--|--|
| Purchase cost                           | Endoscope                                                  |  |  |  |
|                                         | Accessories                                                |  |  |  |
|                                         | Warranty                                                   |  |  |  |
| Training costs                          | Biomedical staff                                           |  |  |  |
|                                         | Users                                                      |  |  |  |
| Qualification costs                     |                                                            |  |  |  |
| Annual requalification costs            |                                                            |  |  |  |
| Maintenance costs                       | Consumables                                                |  |  |  |
|                                         | Replacement parts                                          |  |  |  |
|                                         | Service                                                    |  |  |  |
| Average life span of the medical device |                                                            |  |  |  |

## e. QMS implementation costs

Referential: GREPHH

The costs to be estimated are

- the drafting and revision of specific procedures related to the treatment of duodenoscopes,
- practice audits.
  - o Basic audit
  - o Maintenance audit
  - o EDC audit
- And recordings based on the tools « traca-test »

## Supplementary material

Supplement Table 1 Items considered for the cost of an endoscopic retrograde cholangiopancreatographies, in the survey-based and the theoretical approaches

| <b>Item</b>                                                      | <b>Survey-based approach</b> | <b>Theoretical approach</b> |
|------------------------------------------------------------------|------------------------------|-----------------------------|
| Duodenoscope (purchase, maintenance)                             | Evaluated                    | Evaluated                   |
| Automatic endoscope reprocessor (purchase, maintenance)          | Not evaluated                | Evaluated                   |
| Endoscope Drying Cabinet (purchase, maintenance)                 | Not evaluated                | Evaluated                   |
| Microbiological controls                                         | Evaluated                    | Evaluated                   |
| Reprocessing (consumables, human resources)                      | Evaluated                    | Evaluated                   |
| Overheads                                                        | Evaluated                    | Evaluated                   |
| Post-procedural treatment due to duodenoscope-related infections | Not evaluated                | Not evaluated               |
| ERCP-related infections                                          | Not evaluated                | Not evaluated               |
| Disposal (biohazard)                                             | Not evaluated                | Not evaluated               |
| Downtime due to breakdown or maintenance                         | Not evaluated                | Not evaluated               |
| Storage                                                          | Evaluated                    | Evaluated                   |

## Supplementary material

Supplement Table 2 Consumables and operation time for duodenoscope reprocessing considered for the modeling cost assessment

| Step                     | Description             | Consumables                           | Time (minutes) |
|--------------------------|-------------------------|---------------------------------------|----------------|
| Preliminary treatment    | Wiping                  | Hand towels                           | around 5       |
|                          | Aspiration insufflation |                                       |                |
| Leak test                | Connection inflation    | Water                                 |                |
|                          | Immersion               |                                       |                |
|                          | Deflation               |                                       |                |
| 1 <sup>st</sup> cleaning | Tray with detergent     | Water – Non sterile disposable gloves | ≥ 10           |
|                          |                         | Detergent                             |                |
|                          | Swabbing                | Swabs                                 |                |
|                          | Brushing                | Brush                                 |                |
| 1 <sup>st</sup> rinse    | Irrigation rinse        | Standard care water                   | around 3       |
|                          |                         | Syringe                               |                |
|                          |                         | Or tubing to disinfect                |                |
| 2 <sup>nd</sup> cleaning | Immersion               | Tray (for disinfection)               | ≥ 5            |
|                          |                         | Water                                 |                |
| Disinfection             | Immersion               | Disinfectant                          | 3              |
|                          |                         | Water                                 |                |
|                          |                         | Tray to be treated after use          |                |
| Final rinse              | Soaking blowing         | Sterile disposable gloves             | around 3       |
|                          |                         | Biologically controlled water         |                |
|                          |                         | Sterile tray or disposable sheet      |                |
|                          |                         | Tray to be treated after each use     |                |
| Drying                   | Blow                    | Sterile disposable gloves             | around 3       |



## Supplementary material

Supplement Table 3 Number of microbiological controls considered for the modeling cost assessment

| Device           | Number of microbiological controls (per year) |
|------------------|-----------------------------------------------|
| Duodenoscope     | 6                                             |
| Water            | 5                                             |
| EDC              | 4                                             |
| Room environment | 4                                             |

EDC: Endoscope Drying Cabinet

Supplement Table 4 Costs of purchase and maintenance considered for the modeling cost assessment

| Device       | Purchase cost | Product life cycle | Purchase cost (per year) | Maintenance cost (per year) |
|--------------|---------------|--------------------|--------------------------|-----------------------------|
| Duodenoscope | €30,000       | 4 years            | €7,500                   | €6,000                      |
| AER          | €30,000       | 6 years            | €5,000                   | €6,000                      |
| EDC          | €26,000       | 8 years            | €3,250                   | €1,700                      |

AER: Automated Endoscope Reprocessing machine, EDC: Endoscope Drying Cabinet
